# Supplementary material
Source: Royal Society of Chemistry journal article supplement (doi:10.1039/d6ta02106a)
Supplement: d6ta02106a1.pdf [file d6ta02106a1.pdf]

## Supporting Information

# Non-Stoichiometry as a Structural Lever: Tailoring Oxygen Sublattice Occupancy for Enhanced Oxide-Ion Transport in BIVCUOX

Wei-Xin Yan<sup>a</sup>, Dong-Mei Zhu<sup>a</sup>, Ke Shu<sup>a</sup>, Huai-Hai Li<sup>a</sup>, Lei-Ming Fang<sup>b</sup>, Chun-Hai Wang<sup>a,\*</sup>

<sup>a</sup>State Key Laboratory of Solidification Processing, Northwestern Polytechnical University, Xi'an, Shaanxi 710072, China

<sup>b</sup>Key Laboratory for Neutron Physics, Institute of Nuclear Physics and Chemistry, China Academy of Engineering Physics, Mianyang 621900, People's Republic of China

\* Corresponding author, email: [chwang81@gmail.com](mailto:chwang81@gmail.com)

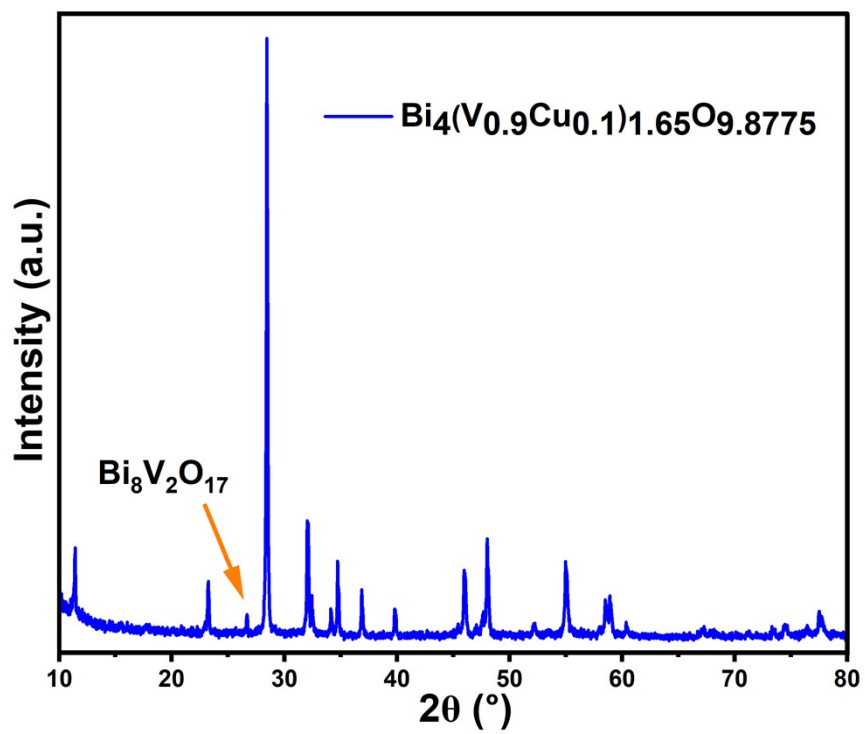

Fig.S1 The XRD pattern of  $\text{Bi}_4(\text{V}_{0.9}\text{Cu}_{0.1})_{1.65}\text{O}_{9.8775}$

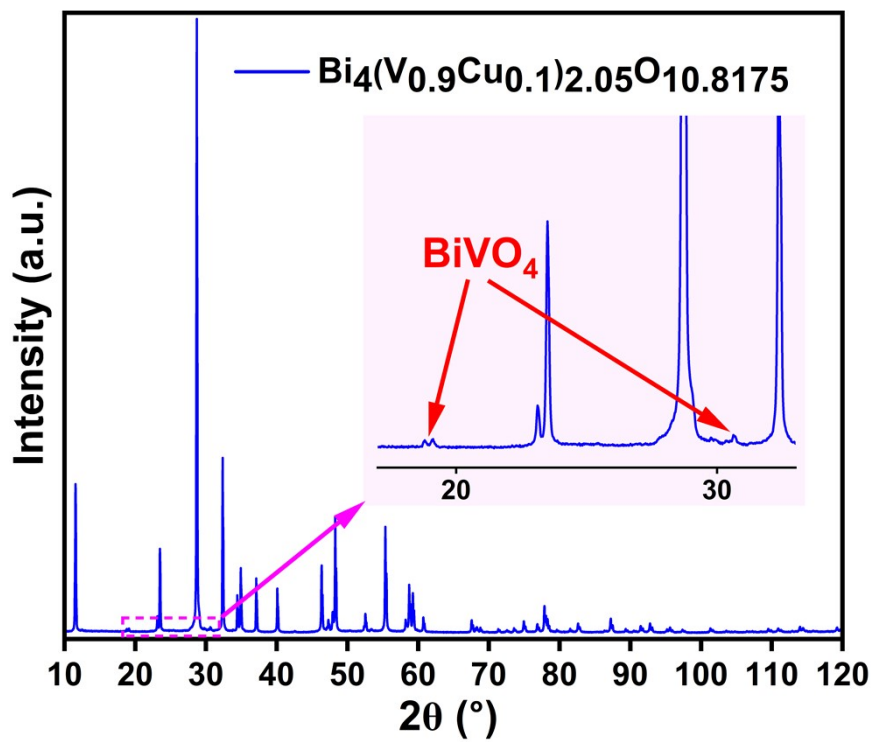

Fig.S2 The XRD pattern of  $\text{Bi}_4(\text{V}_{0.9}\text{Cu}_{0.1})_{2.05}\text{O}_{10.8175}$

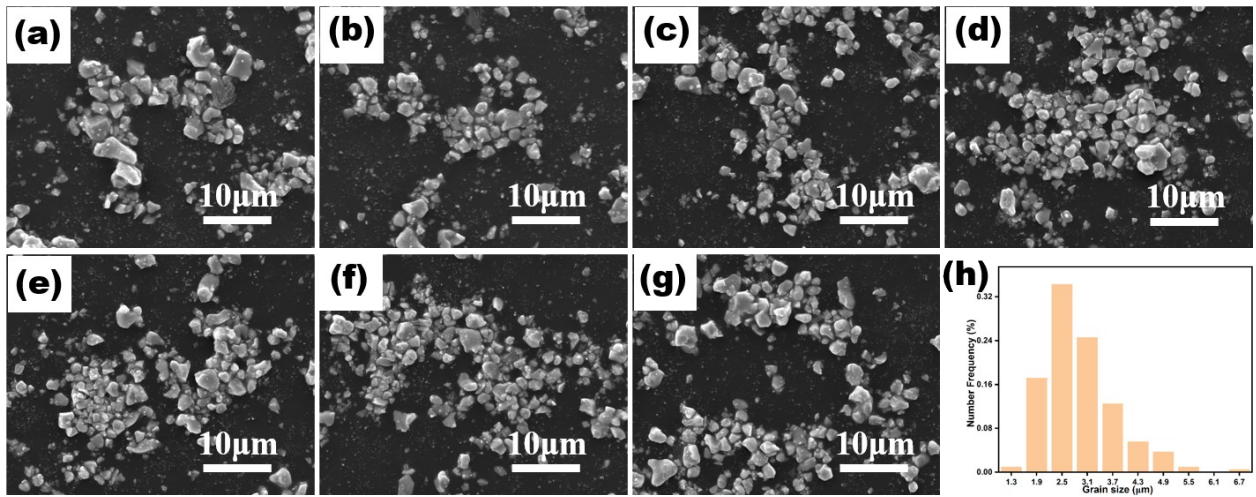

Fig. S3 (a – g) SEM images of  $\text{Bi}_4(\text{V}_{0.9}\text{Cu}_{0.1})_x\text{O}_{6+2.35x}$  ( $1.70 \leq x \leq 2.00$ ) powders; (h) The distribution of powder size of  $\text{Bi}_4(\text{V}_{0.9}\text{Cu}_{0.1})_x\text{O}_{6+2.35x}$

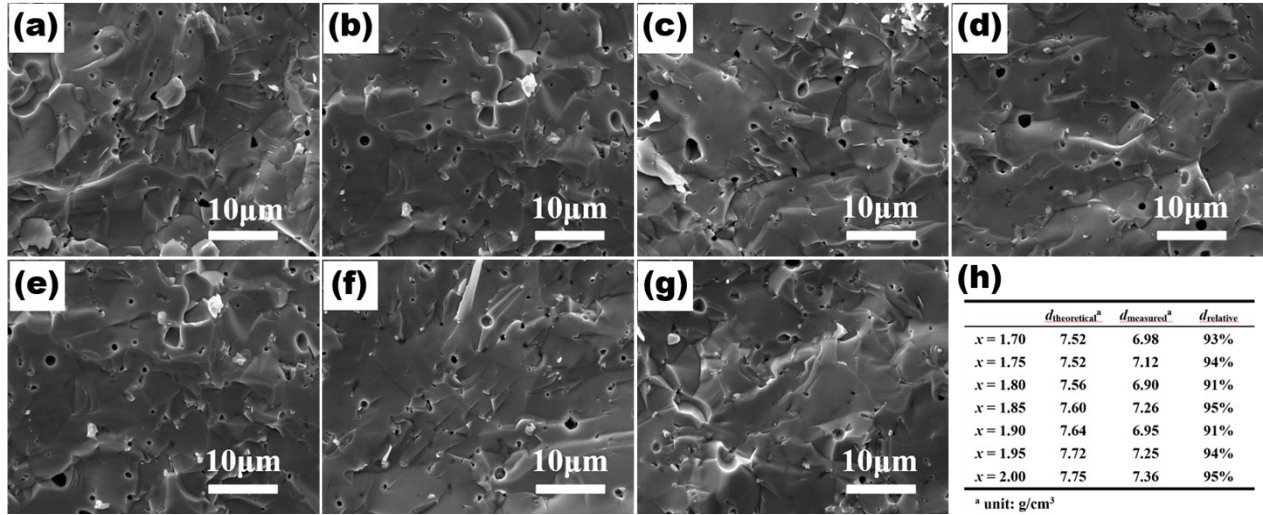

Fig. S4 (a – g) SEM images of Bi<sub>4</sub>(V<sub>0.9</sub>Cu<sub>0.1</sub>)<sub>x</sub>O<sub>6+2.35x</sub> ( $1.70 \leq x \leq 2.00$ ) fractured surface of ceramics; (h) The theoretical, measured and relative density of Bi<sub>4</sub>(V<sub>0.9</sub>Cu<sub>0.1</sub>)<sub>x</sub>O<sub>6+2.35x</sub>



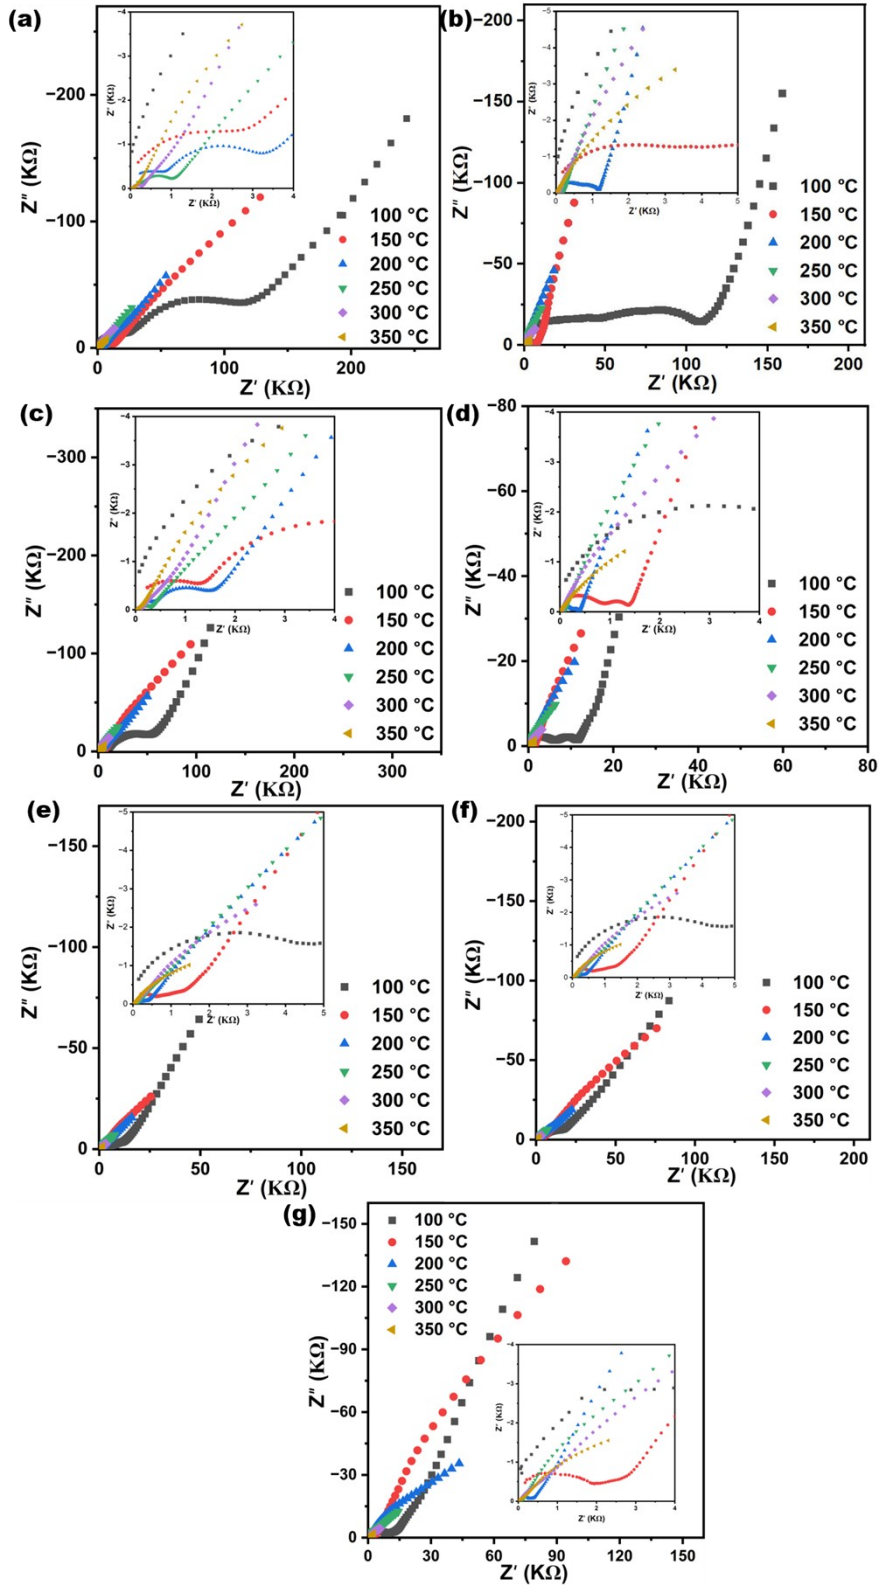

Fig. S6 Nyquist plots of  $\text{Bi}_4(\text{V}_{0.9}\text{Cu}_{0.1})_x\text{O}_{6+2.35x}$  ( $1.70 \leq x \leq 2.00$ ) (a)  $x = 1.70$ ; (b)  $x = 1.75$ ; (c)  $x = 1.80$ ; (d)  $x = 1.85$ ; (e)  $x = 1.90$ ; (f)  $x = 1.95$  and (g)  $x = 2.00$

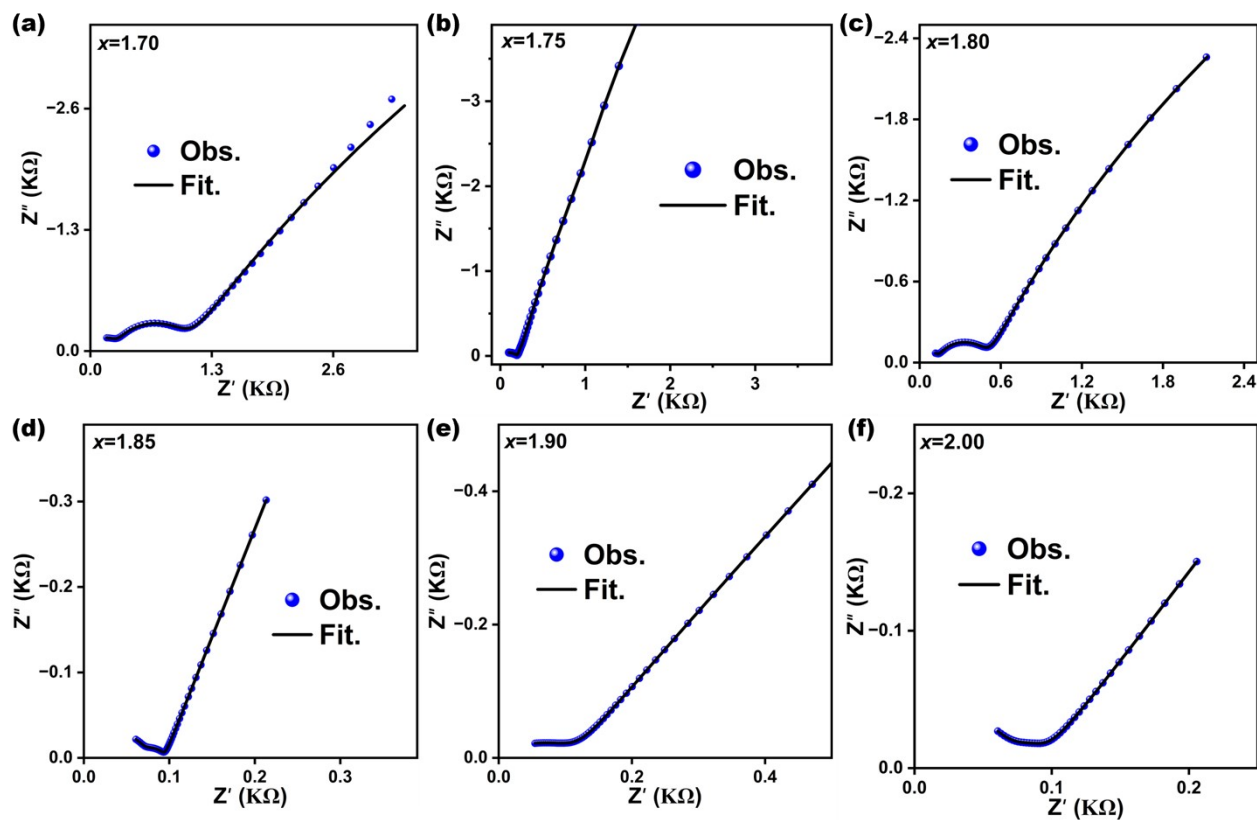

Fig. S7 The Nyquist plot of  $\text{Bi}_4(\text{V}_{0.9}\text{Cu}_{0.1})_x\text{O}_{6+2.35x}$  ( $1.75 \leq x \leq 2.00$ ) recorded at  $250^\circ\text{C}$  (a)  $x = 1.75$ ; (b)  $x = 1.80$ ; (c)  $x = 1.85$ ; (d)  $x = 1.90$ ; (e)  $x = 1.95$ ; (f)  $x = 2.00$ . The black line and blue circles denote the fit to the data and experimental data, respectively.

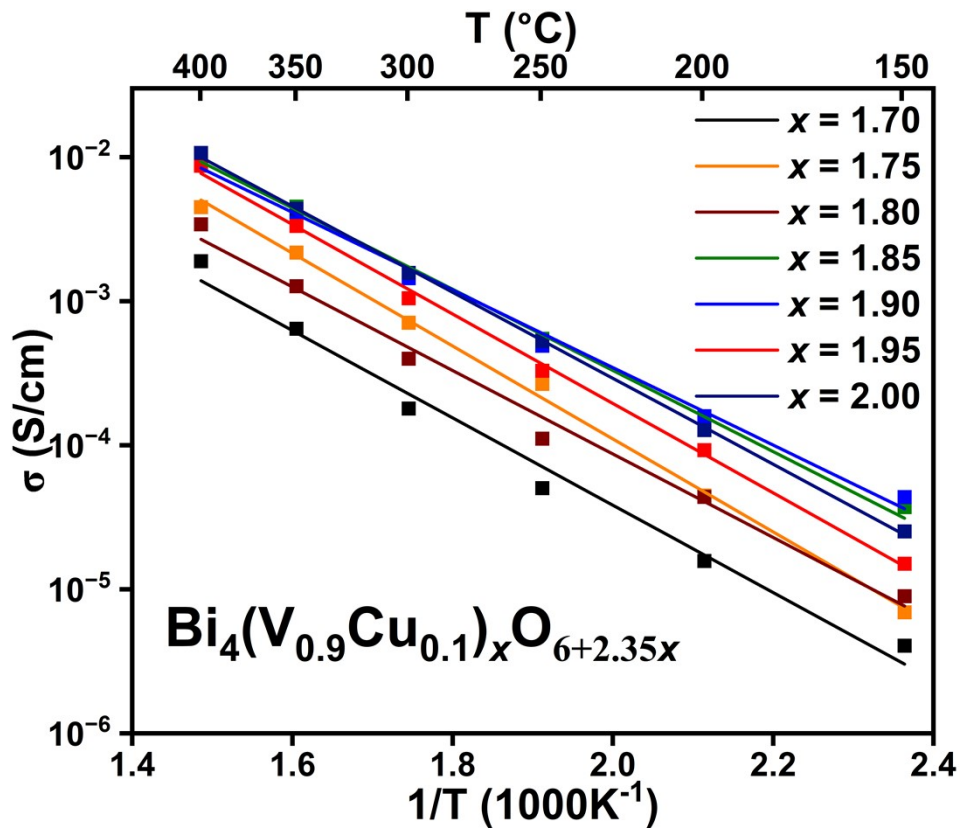

Fig. S8 The total conductivity of  $\text{Bi}_4(\text{V}_{0.9}\text{Cu}_{0.1})_x\text{O}_{6+2.35x}$  ( $1.70 \leq x \leq 2.00$ )

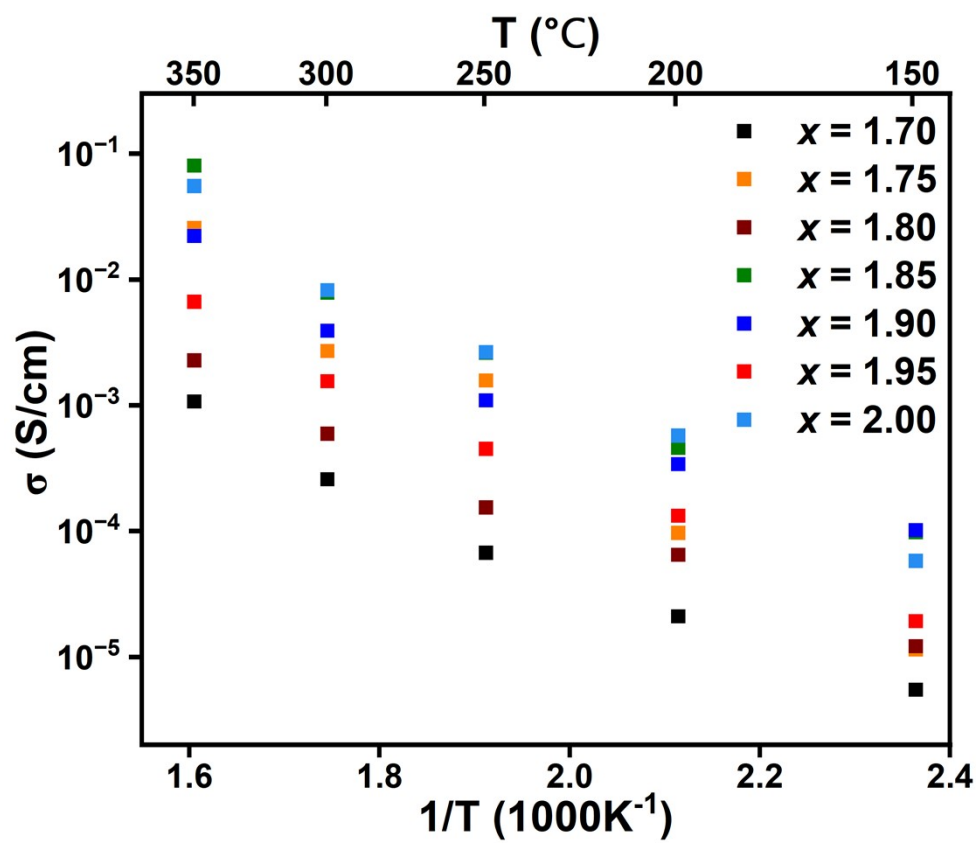

Fig. S9 The grain boundary conductivity of  $\text{Bi}_4(\text{V}_{0.9}\text{Cu}_{0.1})_x\text{O}_{6+2.35x}$  ( $1.70 \leq x \leq 2.00$ )

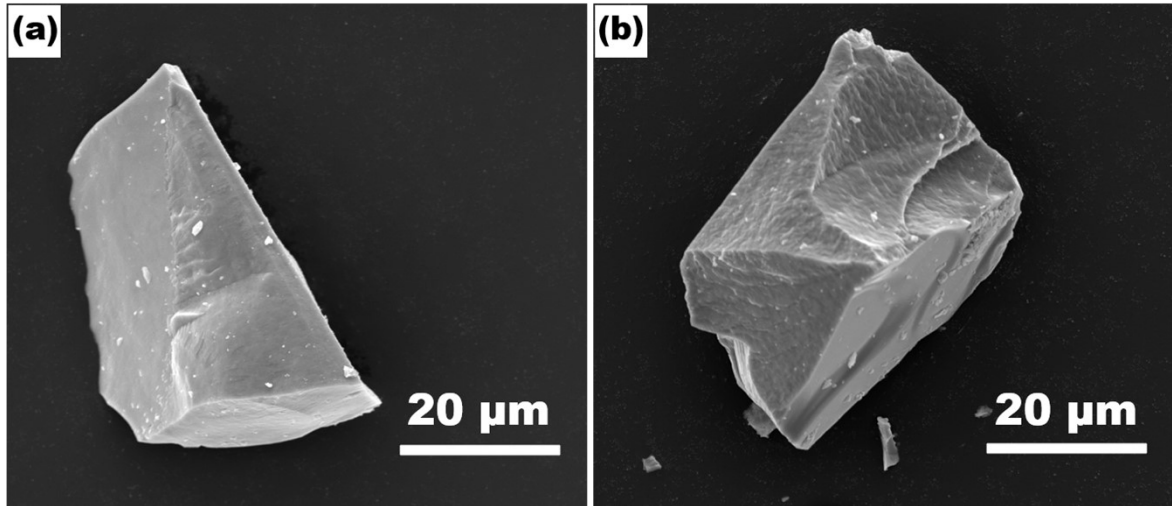

Fig. S10 The SEM images of  $\text{Bi}_4(\text{V}_{0.9}\text{Cu}_{0.1})_{1.95}\text{O}_{10.5825}$  and  $\text{Bi}_4(\text{V}_{0.9}\text{Cu}_{0.1})_{2.00}\text{O}_{10.7}$  microcrystal

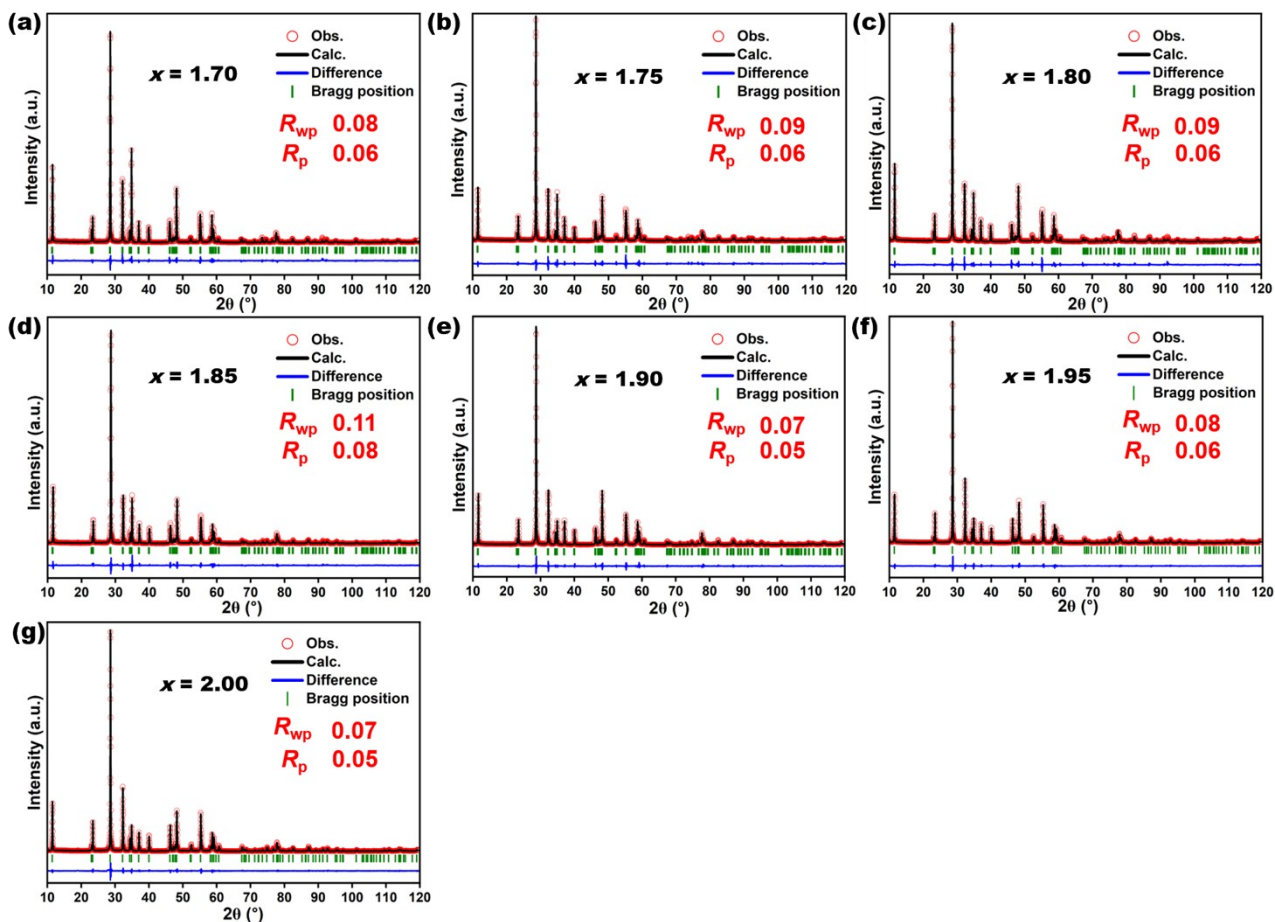

Fig. S11 Patterns of Rietveld refinement of  $\text{Bi}_4(\text{V}_{0.9}\text{Cu}_{0.1})_x\text{O}_{6+2.35x}$  ( $1.70 \leq x \leq 2.00$ ) obtained from PXRD. Red circles, black lines, blue lines, and green ticks represent observed, calculated, difference intensities, and Bragg peak positions, respectively.

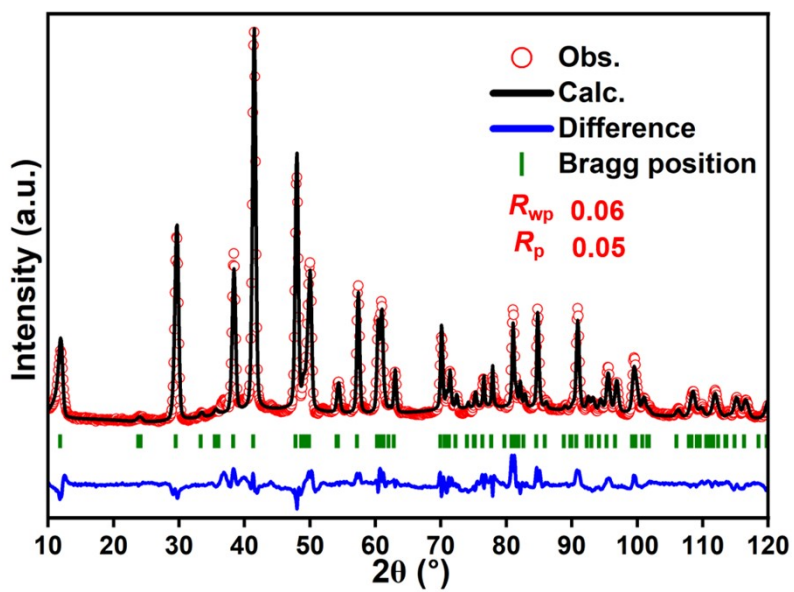

Fig. S12 Patterns of Rietveld refinement of  $\text{Bi}_4(\text{V}_{0.9}\text{Cu}_{0.1})_{2.0}\text{O}_{10.7}$  obtained from PND. Red circles, black lines, blue lines, and green ticks represent observed, calculated, difference intensities, and Bragg peak positions, respectively.

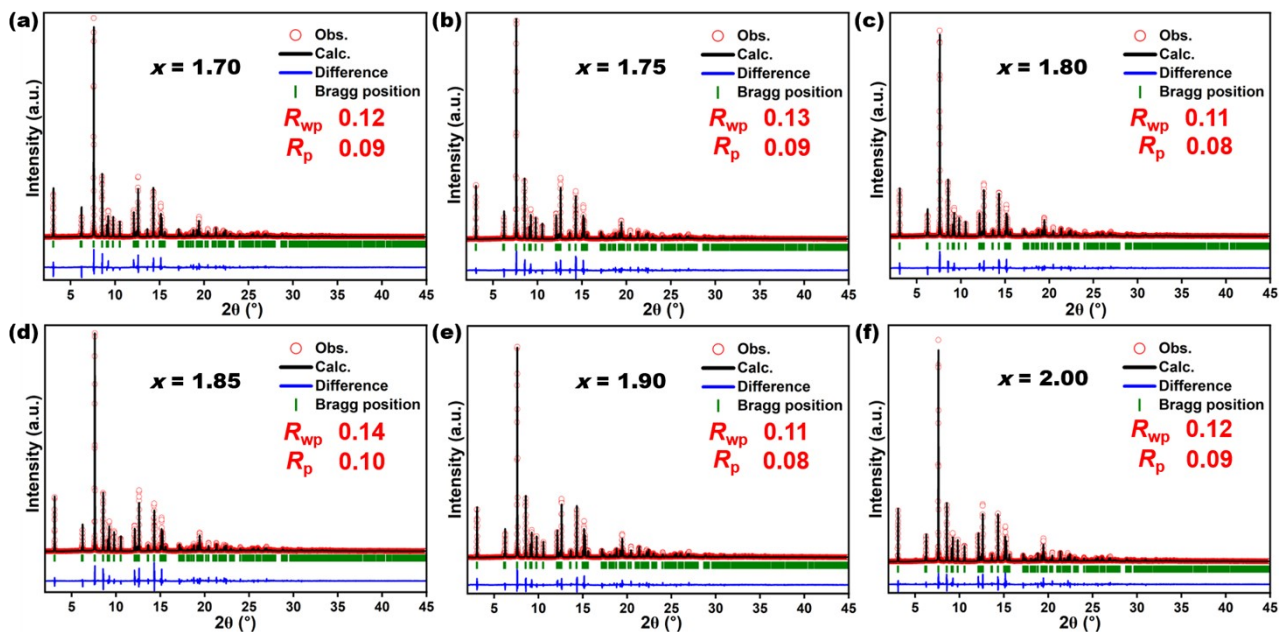

Fig. S13 Patterns of Rietveld refinement of  $\text{Bi}_4(\text{V}_{0.9}\text{Cu}_{0.1})_x\text{O}_{6+2.35x}$  ( $1.70 \leq x \leq 2.00$ ) ( $x = 1.70$ ,  $x = 1.75$ ,  $x = 1.85$ ,  $x = 1.90$  and  $x = 2.00$ ) obtained from SRXRD. Red circles, black lines, blue lines, and green ticks represent observed, calculated, difference intensities, and Bragg peak positions, respectively.

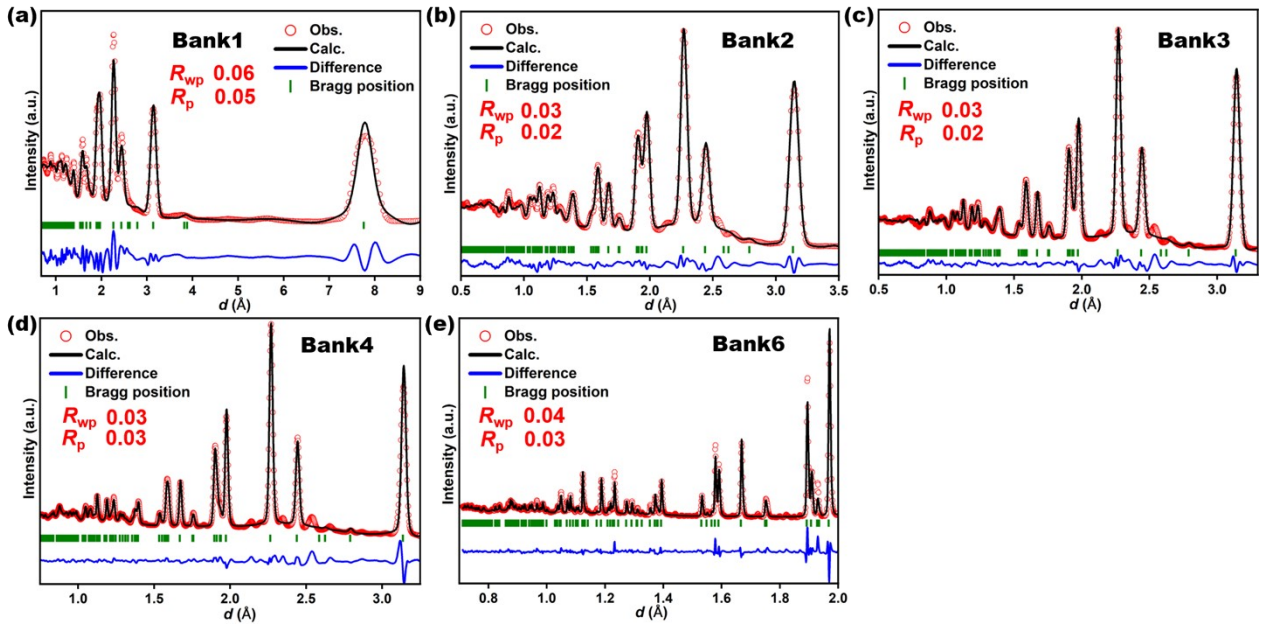

Fig. S14 Patterns of Rietveld refinement of  $\text{Bi}_4(\text{V}_{0.9}\text{Cu}_{0.1})_{1.95}\text{O}_{10.5825}$  obtained from TOF. (a) Bank1 ( $d = 0.6 - 9.0$  Å); (b) Bank2 ( $d = 0.5 - 3.5$  Å); (c) Bank3 ( $d = 0.5 - 3.3$  Å); (d) Bank4 ( $d = 0.7 - 3.2$  Å); (e) Bank6 ( $d = 0.7 - 2.0$  Å). Red circles, black lines, blue lines, and green ticks represent observed, calculated, difference intensities, and Bragg peak positions, respectively.

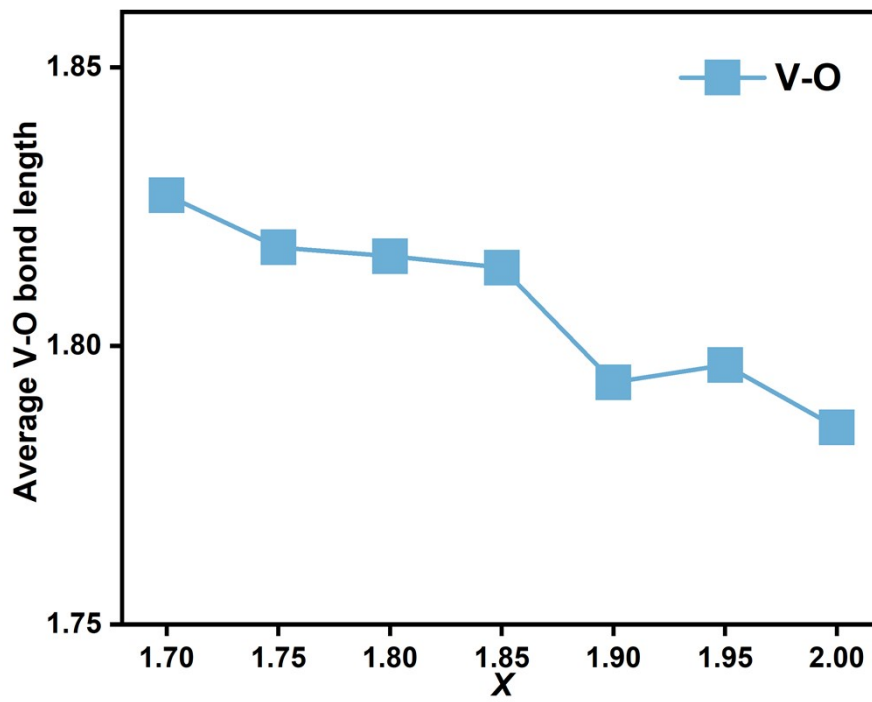

Fig. S15 The average bond length of V-O of  $\text{Bi}_4(\text{V}_{0.9}\text{Cu}_{0.1})_x\text{O}_{6+2.35x}$  ( $1.70 \leq x \leq 2.00$ )

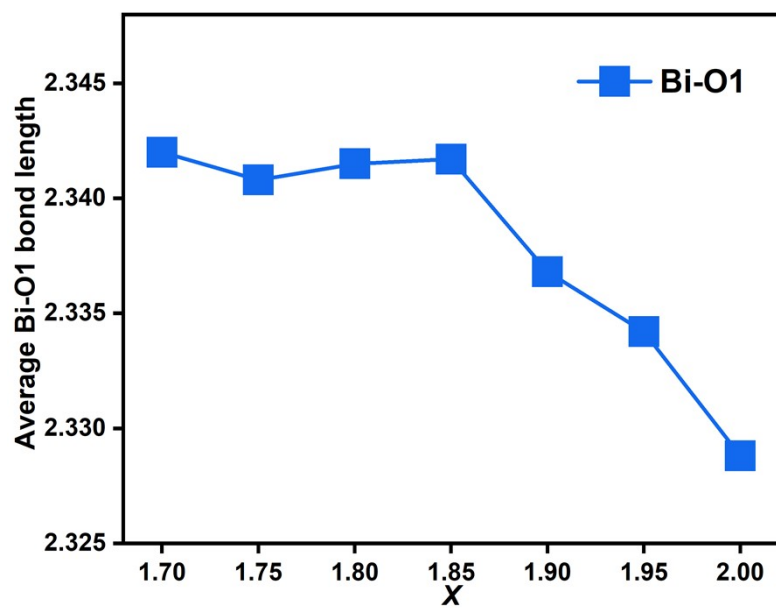

Fig. S16 The average bond length of Bi-O of  $\text{Bi}_4(\text{V}_{0.9}\text{Cu}_{0.1})_x\text{O}_{6+2.35x}$  ( $1.70 \leq x \leq 2.00$ )

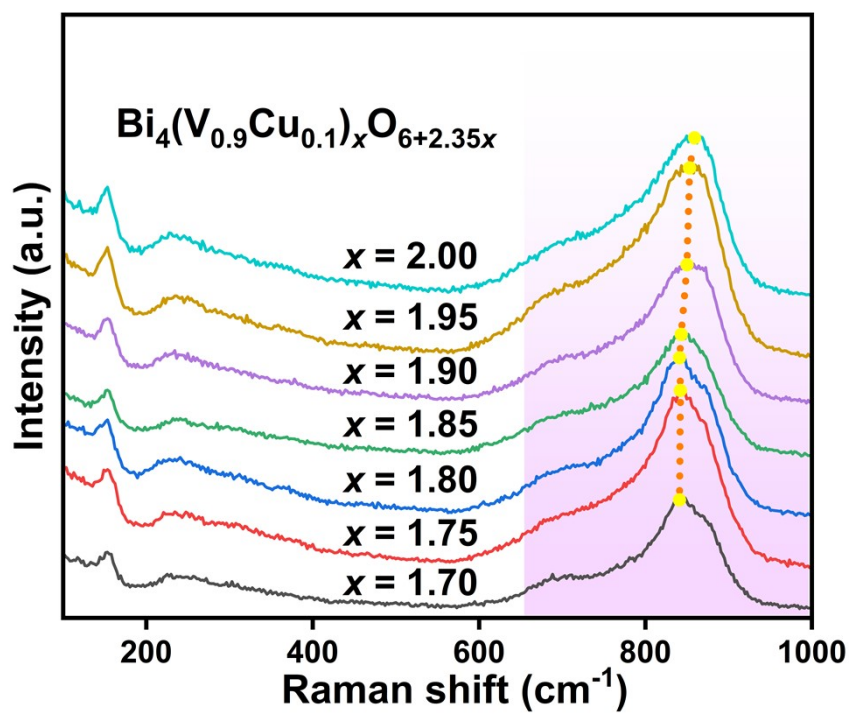

Fig. S17 The Raman spectra of  $\text{Bi}_4(\text{V}_{0.9}\text{Cu}_{0.1})_x\text{O}_{6+2.35x}$  ( $1.70 \leq x \leq 2.00$ )

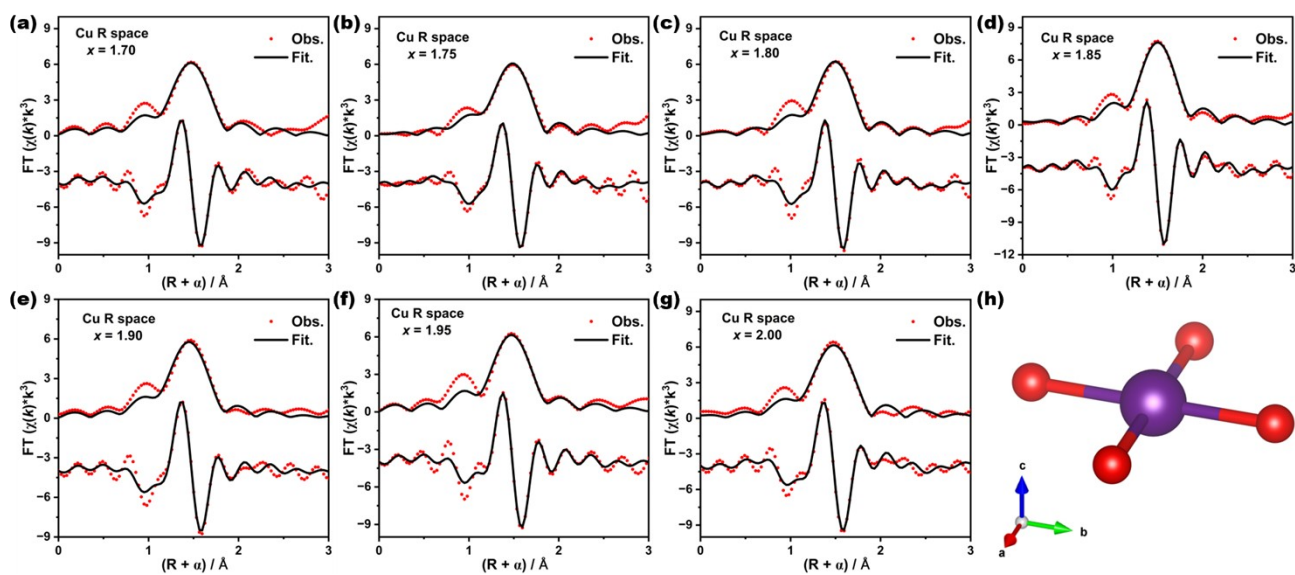

Fig. S18 Cu-edge EXAFS of  $\text{Bi}_4(\text{V}_{0.9}\text{Cu}_{0.1})_x\text{O}_{6+2.35x}$  ( $1.70 \leq x \leq 2.0$ ) in non-phase-corrected R-space ((FT magnitude and its imaginary component, red points); (h) The structure represents refinement to the first-coordination sphere of a Cu–O model.

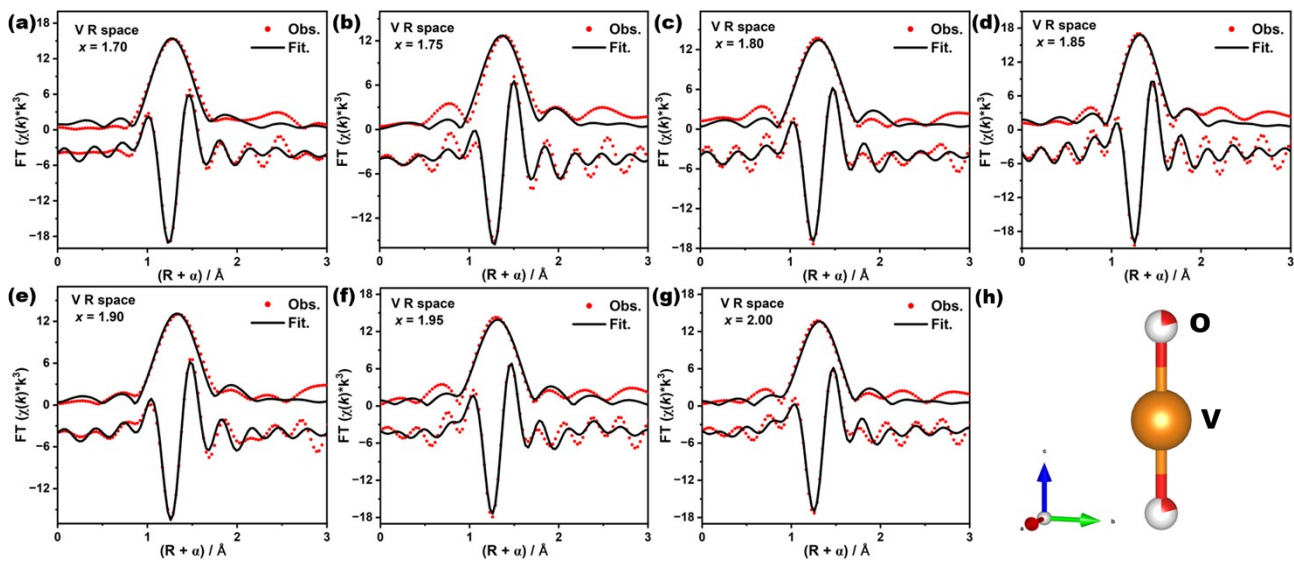

Fig. S19 V-edge EXAFS of  $\text{Bi}_4(\text{V}_{0.9}\text{Cu}_{0.1})_x\text{O}_{6+2.35x}$  ( $1.70 \leq x \leq 2.0$ ) in non-phase-corrected R-space (FT magnitude and its imaginary component, red points)

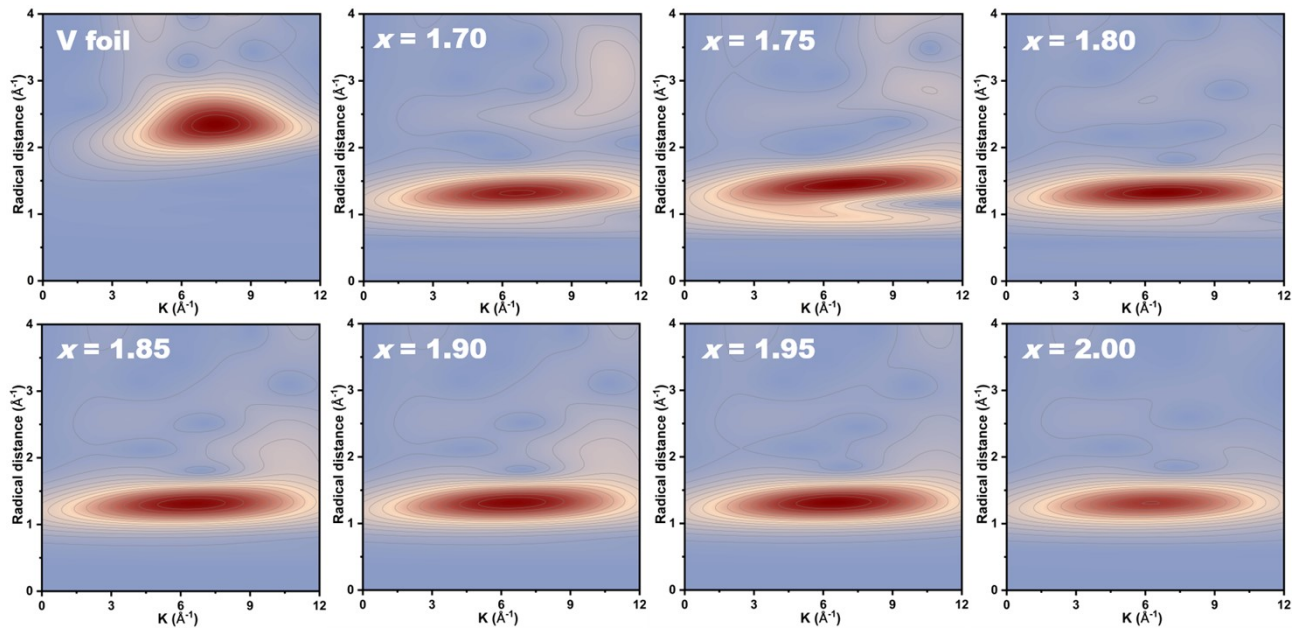

Fig. S20 Wavelet transforms of the  $k^3$ -weighted V

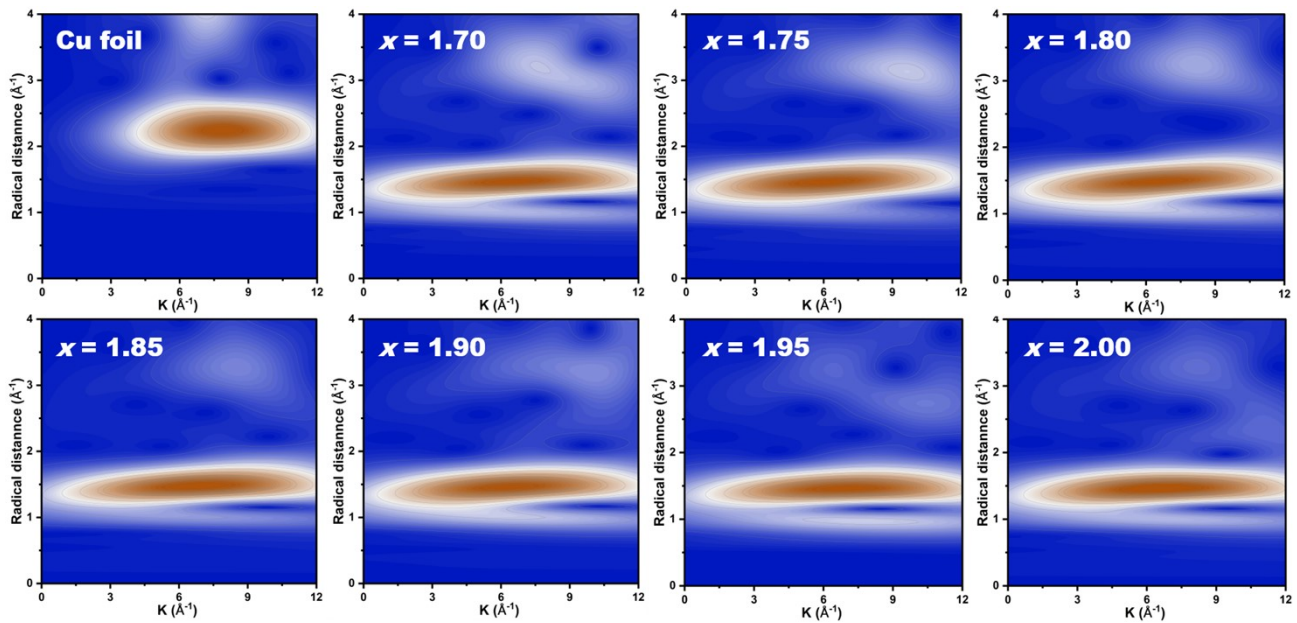

Fig. S21 Wavelet transforms of the  $k^3$ -weighted Cu

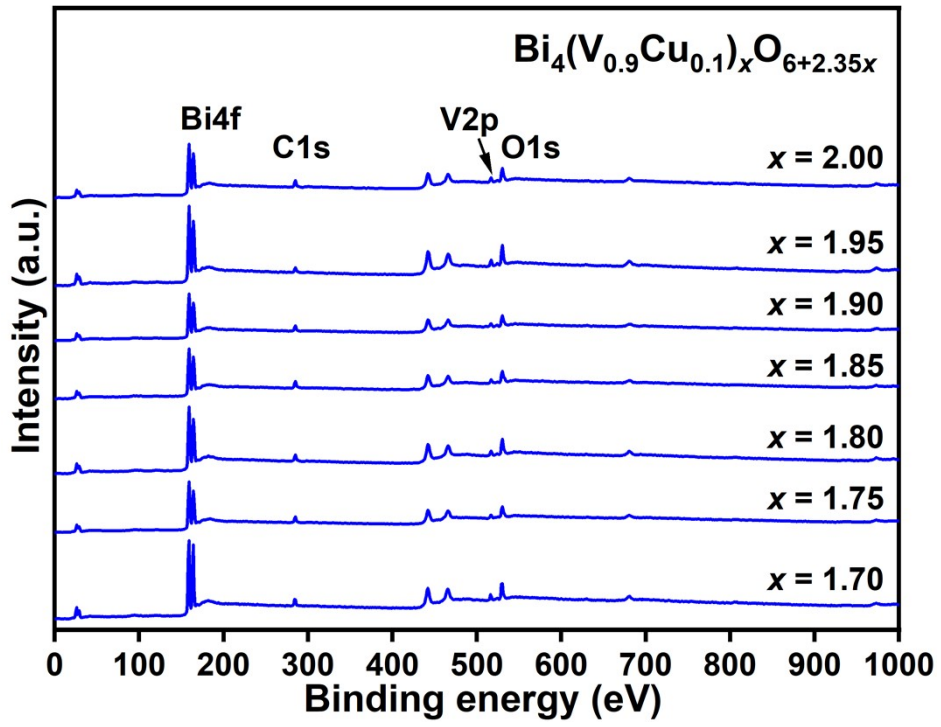

Fig. S22 The full XPS of  $\text{Bi}_4(\text{V}_{0.9}\text{Cu}_{0.1})_x\text{O}_{6+2.35x}$  ( $1.70 \leq x \leq 2.0$ )

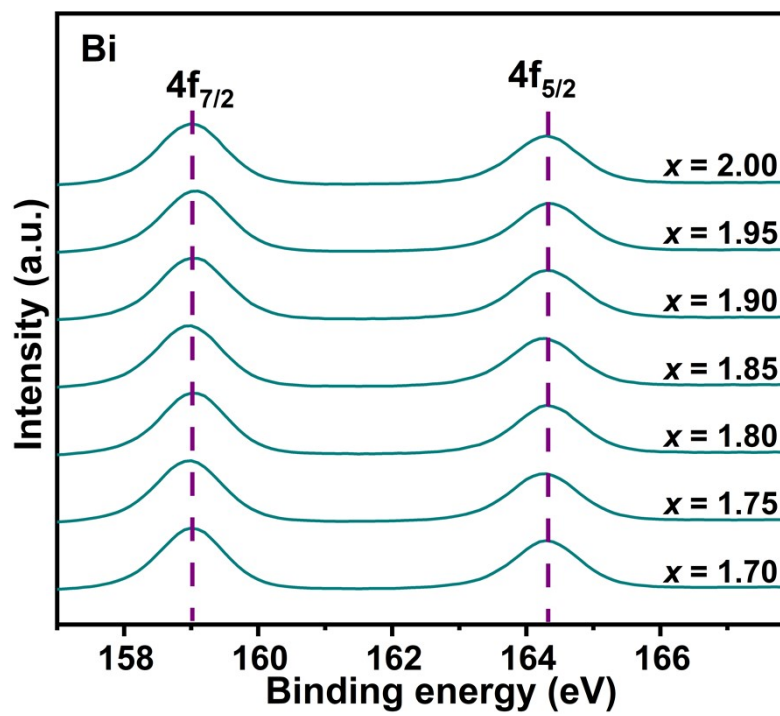

Fig. S23 High-resolution XPS of Bismuth 4f

Table S1 Grain and total ionic conductivity and activation energy of ns-BICUVOX

| Samples    | Grain      | Total      |
|------------|------------|------------|
|            | $E_a$ (eV) | $E_a$ (eV) |
| $x = 1.70$ | 0.52(2)    | 0.60(2)    |
| $x = 1.75$ | 0.55(2)    | 0.64(2)    |
| $x = 1.80$ | 0.51(2)    | 0.57(2)    |
| $x = 1.85$ | 0.49(2)    | 0.55(2)    |
| $x = 1.90$ | 0.47(2)    | 0.53(2)    |
| $x = 1.95$ | 0.53(2)    | 0.61(2)    |
| $x = 2.00$ | 0.53(2)    | 0.59(2)    |

Table S2 The details of the crystal structure of  $\text{Bi}_4(\text{V}_{0.9}\text{Cu}_{0.1})_{1.95}\text{O}_{10.5825}$  obtained from SXRD

| $\text{Bi}_4(\text{V}_{0.9}\text{Cu}_{0.1})_{1.95}\text{O}_{10.5825}$ (from SXRD) <sup>a</sup> |      |                             |          |
|------------------------------------------------------------------------------------------------|------|-----------------------------|----------|
| Space group                                                                                    |      | $I4/mmm$ (no.139)           |          |
| $a$ (Å)                                                                                        |      | 3.9211(3)                   |          |
| $c$ (Å)                                                                                        |      | 15.4283(1)                  |          |
| $V$ (Å <sup>3</sup> )                                                                          |      | 237.210(3)                  |          |
| $d_{\text{theory}}$ (g cm <sup>-3</sup> )                                                      |      | 7.7(1)                      |          |
| Atom                                                                                           | Site | Coordinate                  | Occ.     |
| Bi                                                                                             | 4e   | (0.5, 0.5, 0.1692(4))       | 1        |
| V                                                                                              | 2a   | (0, 0, 0)                   | 0.8775   |
| Cu                                                                                             | 2a   | (0, 0, 0)                   | 0.0975   |
| O1                                                                                             | 4d   | (0.5, 0, 0.25)              | 1        |
| O2                                                                                             | 8g   | (0, 0.5, 0.0302(2))         | 0.340(1) |
| O3                                                                                             | 4e   | (0.5, 0.5, 0.3926(1))       | 0.221(2) |
| O4                                                                                             | 16n  | (0.6752(1), 0.5, 0.5959(1)) | 0.186(2) |

<sup>a</sup> Measured temperature 150 KTable S3. The ADP for each site in  $\text{Bi}_4(\text{V}_{0.9}\text{Cu}_{0.1})_{1.95}\text{O}_{10.5825}$  (unit: Å<sup>2</sup>)

|      | $U_{11}$  | $U_{22}$  | $U_{33}$  | $U_{12}$ | $U_{13}$ | $U_{23}$ |
|------|-----------|-----------|-----------|----------|----------|----------|
| Bi   | 0.0245(2) | 0.0245(2) | 0.0163(2) | 0        | 0        | 0        |
| V/Cu | 0.0434(1) | 0.0434(1) | 0.0112(1) | 0        | 0        | 0        |
| O1   | 0.0108(2) | 0.0108(2) | 0.0351(2) | 0        | 0        | 0        |
| O2   | 0.0657(2) | 0.0624(2) | 0.0752(2) | 0        | 0        | 0        |
| O3   | 0.0657(2) | 0.0624(2) | 0.0752(2) | 0        | 0        | 0        |
| O4   | 0.0657(2) | 0.0624(2) | 0.0752(2) | 0        | 0        | 0        |

Table S4 The details of the crystal structure of  $\text{Bi}_4(\text{V}_{0.9}\text{Cu}_{0.1})_{2.00}\text{O}_{10.7}$  obtained from SXRD

| $\text{Bi}_4(\text{V}_{0.9}\text{Cu}_{0.1})_{2.00}\text{O}_{10.7}$ (from SXRD) <sup>a</sup> |      |                             |          |
|---------------------------------------------------------------------------------------------|------|-----------------------------|----------|
| Space group                                                                                 |      | $I4/mmm$ (no.139)           |          |
| $a$ (Å)                                                                                     |      | 3.9205(3)                   |          |
| $c$ (Å)                                                                                     |      | 15.4476(1)                  |          |
| $V$ (Å <sup>3</sup> )                                                                       |      | 237.435(3)                  |          |
| $d_{\text{theory}}$ (g cm <sup>-3</sup> )                                                   |      | 7.7(1)                      |          |
| Atom                                                                                        | Site | Coordinate                  | Occ.     |
| Bi                                                                                          | 4e   | (0.5, 0.5, 0.1692(2))       | 1        |
| V                                                                                           | 2b   | (0, 0, 0)                   | 0.9      |
| Cu                                                                                          | 2b   | (0, 0, 0)                   | 0.1      |
| O1                                                                                          | 4d   | (0.5, 0, 0.25)              | 1        |
| O2                                                                                          | 8g   | (0, 0.5, 0.0343(2))         | 0.316(1) |
| O3                                                                                          | 4e   | (0.5, 0.5, 0.3974(2))       | 0.400(2) |
| O4                                                                                          | 16n  | (0.7594(2), 0.5, 0.5890(2)) | 0.160(2) |

<sup>a</sup> Measured temperature 150 KTable S5. The ADP for each site in  $\text{Bi}_4(\text{V}_{0.9}\text{Cu}_{0.1})_{2.00}\text{O}_{10.7}$  (unit: Å<sup>2</sup>)

|      | $U_{11}$  | $U_{22}$  | $U_{33}$  | $U_{12}$ | $U_{13}$ | $U_{23}$ |
|------|-----------|-----------|-----------|----------|----------|----------|
| Bi   | 0.0197(2) | 0.0197(2) | 0.0122(2) | 0        | 0        | 0        |
| Cu/V | 0.0370(1) | 0.0370(1) | 0.0129(1) | 0        | 0        | 0        |
| O1   | 0.0048(2) | 0.0048(2) | 0.0223(2) | 0        | 0        | 0        |
| O2   | 0.0578(3) | 0.0821(3) | 0.0702(2) | 0        | 0        | 0        |
| O3   | 0.0578(3) | 0.0821(3) | 0.0702(2) | 0        | 0        | 0        |
| O4   | 0.0578(3) | 0.0821(3) | 0.0702(2) | 0        | 0        | 0        |

Table S6 The details of the crystal structure of  $\text{Bi}_4(\text{V}_{0.9}\text{Cu}_{0.1})_{1.7}\text{O}_{9.995}$  obtained from PXRD and SRXRD

| $\text{Bi}_4(\text{V}_{0.9}\text{Cu}_{0.1})_{1.7}\text{O}_{9.995}$ (from PXRD and SRXRD) |      |                             |         |                                    |
|------------------------------------------------------------------------------------------|------|-----------------------------|---------|------------------------------------|
| Space group                                                                              |      | $I4/mmm$ (NO.139)           |         |                                    |
| $a$ (Å)                                                                                  |      | 3.9414(4)                   |         |                                    |
| $c$ (Å)                                                                                  |      | 15.4758(1)                  |         |                                    |
| $V$ (Å <sup>3</sup> )                                                                    |      | 240.410(2)                  |         |                                    |
| $d_{\text{theory}}$ (g cm <sup>-3</sup> )                                                |      | 7.52(2)                     |         |                                    |
| Atom                                                                                     | Site | Coordinate                  | Occ.    | $B_{\text{iso}}$ (Å <sup>2</sup> ) |
| Bi                                                                                       | 4e   | (0.5, 0.5, 0.1682(4))       | 1       | 2.3(1)                             |
| V                                                                                        | 2a   | (0, 0, 0)                   | 0.765   | 0.1(1)                             |
| Cu                                                                                       | 2a   | (0, 0, 0)                   | 0.085   | 0.1(1)                             |
| O1                                                                                       | 4d   | (0, 0.5, 0.25)              | 1       | 3.3(1)                             |
| O2                                                                                       | 8g   | (0.5, 0, 0.4797(2))         | 0.50(1) | 8.0(1)                             |
| O3                                                                                       | 4e   | (0, 0, 0.1136(1))           | 0.10(1) | 5.9(1)                             |
| O4                                                                                       | 16n  | (0.6379(2), 0.5, 0.6059(1)) | 0.10(1) | 5.9(1)                             |

Table S7 The details of the crystal structure of  $\text{Bi}_4(\text{V}_{0.9}\text{Cu}_{0.1})_{1.75}\text{O}_{10.1125}$  obtained from PXRD

| $\text{Bi}_4(\text{V}_{0.9}\text{Cu}_{0.1})_{1.75}\text{O}_{10.1125}$ (from PXRD) |      |                             |        |                                    |
|-----------------------------------------------------------------------------------|------|-----------------------------|--------|------------------------------------|
| Space group                                                                       |      | $I4/mmm$ (NO.139)           |        |                                    |
| $a$ (Å)                                                                           |      | 3.9363(4)                   |        |                                    |
| $c$ (Å)                                                                           |      | 15.4719(1)                  |        |                                    |
| $V$ (Å <sup>3</sup> )                                                             |      | 239.733(2)                  |        |                                    |
| $d_{\text{theory}}$ (g cm <sup>-3</sup> )                                         |      | 7.52(2)                     |        |                                    |
| Atom                                                                              | Site | Coordinate                  | Occ.   | $B_{\text{iso}}$ (Å <sup>2</sup> ) |
| Bi                                                                                | 4e   | (0.5, 0.5, 0.1681(4))       | 1      | 2.4(1)                             |
| V                                                                                 | 2a   | (0, 0, 0)                   | 0.7875 | 0.1(1)                             |
| Cu                                                                                | 2a   | (0, 0, 0)                   | 0.0875 | 0.1(1)                             |
| O1                                                                                | 4d   | (0, 0.5, 0.25)              | 1      | 2.3(1)                             |
| O2                                                                                | 8g   | (0.5, 0, 0.4797(2))         | 0.46   | 8.0(1)                             |
| O3                                                                                | 4e   | (0, 0, 0.1123(1))           | 0.22   | 6.0(1)                             |
| O4                                                                                | 16n  | (0.6352(2), 0.5, 0.6059(1)) | 0.08   | 6.0(1)                             |

Table S8 The details of the crystal structure of  $\text{Bi}_4(\text{V}_{0.9}\text{Cu}_{0.1})_{1.80}\text{O}_{10.23}$  obtained from PXRD and SRXRD

| $\text{Bi}_4(\text{V}_{0.9}\text{Cu}_{0.1})_{1.80}\text{O}_{10.23}$ (from PXRD and SRXRD) |      |                             |      |                                    |
|-------------------------------------------------------------------------------------------|------|-----------------------------|------|------------------------------------|
| Space group                                                                               |      | $I4/mmm$ (NO.139)           |      |                                    |
| $a$ (Å)                                                                                   |      | 3.9391(4)                   |      |                                    |
| $c$ (Å)                                                                                   |      | 15.4666(1)                  |      |                                    |
| $V$ (Å <sup>3</sup> )                                                                     |      | 239.985(2)                  |      |                                    |
| $d_{\text{theory}}$ (g cm <sup>-3</sup> )                                                 |      | 7.56(2)                     |      |                                    |
| Atom                                                                                      | Site | Coordinate                  | Occ. | $B_{\text{iso}}$ (Å <sup>2</sup> ) |
| Bi                                                                                        | 4e   | (0.5, 0.5, 0.1681(4))       | 1    | 2.1(1)                             |
| V                                                                                         | 2a   | (0, 0, 0)                   | 0.81 | 0.6(1)                             |
| Cu                                                                                        | 2a   | (0, 0, 0)                   | 0.09 | 0.6(1)                             |
| O1                                                                                        | 4d   | (0, 0.5, 0.25)              | 1    | 4.0(1)                             |
| O2                                                                                        | 8g   | (0.5, 0, 0.4797(2))         | 0.50 | 8.0(1)                             |
| O3                                                                                        | 4e   | (0, 0, 0.1121(1))           | 0.10 | 3.7(1)                             |
| O4                                                                                        | 16n  | (0.6352(2), 0.5, 0.6059(1)) | 0.11 | 3.7(1)                             |

Table S9 The details of the crystal structure of  $\text{Bi}_4(\text{V}_{0.9}\text{Cu}_{0.1})_{1.85}\text{O}_{10.3475}$  obtained from PXRD

| $\text{Bi}_4(\text{V}_{0.9}\text{Cu}_{0.1})_{1.85}\text{O}_{10.3475}$ (from PXRD) |      |                           |        |                                    |
|-----------------------------------------------------------------------------------|------|---------------------------|--------|------------------------------------|
| Space group                                                                       |      | $I4/mmm$ (NO.139)         |        |                                    |
| $a$ (Å)                                                                           |      | 3.9366(4)                 |        |                                    |
| $c$ (Å)                                                                           |      | 15.4678(1)                |        |                                    |
| $V$ (Å <sup>3</sup> )                                                             |      | 239.715(2)                |        |                                    |
| $d_{\text{theory}}$ (g cm <sup>-3</sup> )                                         |      | 7.60(2)                   |        |                                    |
| Atom                                                                              | Site | Coordinate                | Occ.   | $B_{\text{iso}}$ (Å <sup>2</sup> ) |
| Bi                                                                                | 4e   | (0.5, 0.5, 0.1679(4))     | 1      | 2.1(1)                             |
| V                                                                                 | 2a   | (0, 0, 0)                 | 0.8325 | 0.8(1)                             |
| Cu                                                                                | 2a   | (0, 0, 0)                 | 0.0925 | 0.8(1)                             |
| O1                                                                                | 4d   | (0, 0.5, 0.25)            | 1      | 3.9(1)                             |
| O2                                                                                | 8g   | (0.5, 0, 0.4797(2))       | 0.50   | 8.0(1)                             |
| O3                                                                                | 4e   | (0, 0, 0.1116(1))         | 0.1    | 6.0(1)                             |
| O4                                                                                | 16n  | (0.6352(2), 0, 0.6059(1)) | 0.12   | 6.0(1)                             |

Table S10 The details of the crystal structure of  $\text{Bi}_4(\text{V}_{0.9}\text{Cu}_{0.1})_{1.90}\text{O}_{10.465}$  obtained from PXRD and SRXRD

| $\text{Bi}_4(\text{V}_{0.9}\text{Cu}_{0.1})_{1.90}\text{O}_{10.465}$ (from PXRD and SRXRD) |      |                             |       |                                    |
|--------------------------------------------------------------------------------------------|------|-----------------------------|-------|------------------------------------|
| Space group                                                                                |      | $I4/mmm$ (NO.139)           |       |                                    |
| $a$ (Å)                                                                                    |      | 3.9349(4)                   |       |                                    |
| $c$ (Å)                                                                                    |      | 15.4762(1)                  |       |                                    |
| $V$ (Å <sup>3</sup> )                                                                      |      | 239.626(2)                  |       |                                    |
| $d_{\text{theory}}$ (g cm <sup>-3</sup> )                                                  |      | 7.64(2)                     |       |                                    |
| Atom                                                                                       | Site | Coordinate                  | Occ.  | $B_{\text{iso}}$ (Å <sup>2</sup> ) |
| Bi                                                                                         | 4e   | (0.5, 0.5, 0.1685(4))       | 1     | 1.9(1)                             |
| V                                                                                          | 2a   | (0, 0, 0)                   | 0.855 | 1.5(1)                             |
| Cu                                                                                         | 2a   | (0, 0, 0)                   | 0.095 | 1.5(1)                             |
| O1                                                                                         | 4d   | (0, 0.5, 0.25)              | 1     | 3.5(1)                             |
| O2                                                                                         | 8g   | (0.5, 0, 0.4789(2))         | 0.45  | 8.0(1)                             |
| O3                                                                                         | 4e   | (0, 0, 0.1102(1))           | 0.13  | 3.0(1)                             |
| O4                                                                                         | 16n  | (0.6497(2), 0.5, 0.6017(1)) | 0.14  | 3.0(1)                             |

Table S11 The details of the crystal structure of  $\text{Bi}_4(\text{V}_{0.9}\text{Cu}_{0.1})_{1.95}\text{O}_{10.5825}$  obtained from PXRD and PND

| $\text{Bi}_4(\text{V}_{0.9}\text{Cu}_{0.1})_{1.95}\text{O}_{10.5825}$ (from PXRD and PND) |      |                             |      |                                    |
|-------------------------------------------------------------------------------------------|------|-----------------------------|------|------------------------------------|
| Space group                                                                               |      | $I4/mmm$ (NO.139)           |      |                                    |
| $a$ (Å)                                                                                   |      | 3.9243(4)                   |      |                                    |
| $c$ (Å)                                                                                   |      | 15.4558(1)                  |      |                                    |
| $V$ (Å <sup>3</sup> )                                                                     |      | 238.092(2)                  |      |                                    |
| $d_{\text{theory}}$ (g cm <sup>-3</sup> )                                                 |      | 7.72(2)                     |      |                                    |
| Atom                                                                                      | Site | Coordinate                  | Occ. | $B_{\text{iso}}$ (Å <sup>2</sup> ) |
| Bi                                                                                        | 4e   | (0.5, 0.5, 0.1685(4))       | 1    | 2.7(1)                             |
| V                                                                                         | 2a   | (0, 0, 0)                   | 0.9  | 0.2(1)                             |
| Cu                                                                                        | 2a   | (0, 0, 0)                   | 0.1  | 0.2(1)                             |
| O1                                                                                        | 4d   | (0, 0.5, 0.25)              | 1    | 2.6(1)                             |
| O2                                                                                        | 8g   | (0.5, 0, 0.4720(2))         | 0.38 | 8.9(1)                             |
| O3                                                                                        | 4e   | (0, 0, 0.1102(1))           | 0.27 | 4.2(1)                             |
| O4                                                                                        | 16n  | (0.6955(2), 0.5, 0.5965(1)) | 0.15 | 4.2(1)                             |

Table S12 The details of the crystal structure of  $\text{Bi}_4(\text{V}_{0.9}\text{Cu}_{0.1})_{2.00}\text{O}_{10.7}$  obtained from PXRD and PND

| $\text{Bi}_4(\text{V}_{0.9}\text{Cu}_{0.1})_{2.00}\text{O}_{10.7}$ (from PXRD and PND) |      |                             |      |                                    |
|----------------------------------------------------------------------------------------|------|-----------------------------|------|------------------------------------|
| Space group                                                                            |      | $I4/mmm$ (NO.139)           |      |                                    |
| $a$ (Å)                                                                                |      | 3.9251(4)                   |      |                                    |
| $c$ (Å)                                                                                |      | 15.4482(1)                  |      |                                    |
| $V$ (Å <sup>3</sup> )                                                                  |      | 238.003(2)                  |      |                                    |
| $d_{\text{theory}}$ (g cm <sup>-3</sup> )                                              |      | 7.75(2)                     |      |                                    |
| Atom                                                                                   | Site | Coordinate                  | Occ. | $B_{\text{iso}}$ (Å <sup>2</sup> ) |
| Bi                                                                                     | 4e   | (0.5, 0.5, 0.1688(4))       | 1    | 1.5(1)                             |
| Cu                                                                                     | 2b   | (0, 0, 0)                   | 0.1  | 3.1(1)                             |
| V                                                                                      | 2b   | (0, 0, 0)                   | 0.9  | 3.1(1)                             |
| O1                                                                                     | 4d   | (0, 0.5, 0.25)              | 1    | 1.6(1)                             |
| O2                                                                                     | 8g   | (0.5, 0, 0.4760(2))         | 0.40 | 5.8(1)                             |
| O3                                                                                     | 4e   | (0, 0, 0.1099(1))           | 0.25 | 3.2(1)                             |
| O4                                                                                     | 16n  | (0.6840(2), 0.5, 0.5967(1)) | 0.15 | 3.2(1)                             |

Table S13. Structural parameters extracted from quantitative EXAFS curve fitting

| <b>Sample</b> | <b>Path</b> | <b>CN</b> | <b><math>R(\text{\AA})</math></b> | <b><math>\sigma^2(\text{\AA}^2)</math></b> | <b><math>\Delta E_0(\text{eV})</math></b> | <b><math>R\text{-factor}(\%)</math></b> |
|---------------|-------------|-----------|-----------------------------------|--------------------------------------------|-------------------------------------------|-----------------------------------------|
| $x = 1.70$    | V–O         | 2         | 1.6977                            | 0.002                                      | 8.8                                       | 1.7                                     |
| $x = 1.75$    | V–O         | 2         | 1.7346                            | 0.001                                      | 12.1                                      | 1.8                                     |
| $x = 1.80$    | V–O         | 2         | 1.7187                            | 0.001                                      | 10.7                                      | 1.0                                     |
| $x = 1.85$    | V–O         | 2         | 1.7147                            | 0.001                                      | 10.6                                      | 0.9                                     |
| $x = 1.90$    | V–O         | 2         | 1.7136                            | 0.003                                      | 10.3                                      | 1.1                                     |
| $x = 1.95$    | V–O         | 2         | 1.7144                            | 0.001                                      | 10.5                                      | 0.8                                     |
| $x = 2.00$    | V–O         | 2         | 1.7159                            | 0.002                                      | 10.3                                      | 1.2                                     |

Table S14. Structural parameters extracted from quantitative EXAFS curve fitting

| <b>Sample</b> | <b>Path</b> | <b>CN</b> | <b><math>R(\text{\AA})</math></b> | <b><math>\sigma^2(\text{\AA}^2)</math></b> | <b><math>\Delta E_0(\text{eV})</math></b> | <b><math>R\text{-factor}(\%)</math></b> |
|---------------|-------------|-----------|-----------------------------------|--------------------------------------------|-------------------------------------------|-----------------------------------------|
| $x = 1.70$    | Cu–O        | 4         | 1.9057(1)                         | 0.003                                      | 2.3                                       | 0.2                                     |
| $x = 1.75$    | Cu–O        | 4         | 1.9041(1)                         | 0.003                                      | 2.8                                       | 0.2                                     |
| $x = 1.80$    | Cu–O        | 4         | 1.9081(1)                         | 0.002                                      | 3.7                                       | 0.3                                     |
| $x = 1.85$    | Cu–O        | 4         | 1.9057(1)                         | 0.001                                      | 2.0                                       | 0.1                                     |
| $x = 1.90$    | Cu–O        | 4         | 1.9054(1)                         | 0.002                                      | 3.1                                       | 1.3                                     |
| $x = 1.95$    | Cu–O        | 4         | 1.9108(1)                         | 0.003                                      | 3.4                                       | 0.5                                     |
| $x = 2.00$    | Cu–O        | 4         | 1.9175(1)                         | 0.003                                      | 1.8                                       | 0.3                                     |
